# Supplementary material for: Persicaline, A New Antioxidant Sulphur-Containing Imidazoline Alkaloid from Salvadora persica Roots
Source: PubMed Central journal article supplement (PMC6017864; doi:10.3390/molecules23020483), 2018-02-23
Supplement: molecules-23-00483-s001.pdf [file molecules-23-00483-s001.pdf]

## SUPPLEMENTARY MATERIAL

### **Persicaline, a new antioxidant sulphur-containing imidazoline alkaloid from *Salvadora persica* roots**

Mohamed F. Abd El Halim<sup>a</sup>, Wael M Abdel-Mageed<sup>a,b,\*</sup>, Omer A. Basudan<sup>a</sup> and Ali A. El-Gamal<sup>a,c,\*</sup>

<sup>a</sup>*Pharmacognosy Department, King Saud University, College of Pharmacy, , P.O. Box 2457, Riyadh 11451, Saudi Arabia e-mails: [wabdelmageed@ksu.edu.sa](mailto:wabdelmageed@ksu.edu.sa), & [aelgamal00@yahoo.com](mailto:aelgamal00@yahoo.com)*

<sup>b</sup>*Pharmacognosy Department, Assiut University, Faculty of Pharmacy, , Assiut P.O. Box 71526, Egypt*

<sup>c</sup>*Pharmacognosy Department, Mansoura University, Faculty of Pharmacy, , Mansoura P.O. Box 35516, Egypt*

#### **Abstract**

*Salvadora persica* L. is a popular chewing stick commonly known as 'miswak'. During our ongoing research activities on the chemical constituents of *Salvadora persica* roots, a new sulphur-containing imidazoline alkaloid 1,3-Dibenzyl-4-(1,2,3,4-tetrahydroxy-butyl)-1,3-dihydro-imidazole-2-thione, persicaline, (1) along with five known compounds (2-6) are identified. Compounds (2-3) were reported for the first time from the family *Salvadoraaceae*. The structure of the new compound was established by extensive spectroscopic data and HR-MS. The antioxidant activities of the fractions and isolates were evaluated using different *in vitro* methods such as DPPH, superoxide anion and nitric oxide radicals scavenging assays. Compound (1) showed a promising antioxidant activity with IC<sub>50</sub> 0.1, 0.08 and 0.09 μM in the three assays respectively comparable to ascorbic acid.

**Keywords:** *Salvadora persica*; Persicaline; Imidazoline Alkaloids; Sulphur-containing compounds; Radical Scavenging Activity.

## Content

**Table S1**  $^1\text{H}$  NMR and  $^{13}\text{C}$  NMR spectroscopic data of compounds **2**

**Table S2**  $^1\text{H}$  NMR and  $^{13}\text{C}$  NMR spectroscopic data of compounds **3**

**Figure S1.**  $^1\text{H}$  NMR spectrum of compound (**1**) (700 MHz,  $\text{DMSO-}d_6$ )

**Figure S2.**  $^{13}\text{C}$  NMR spectrum of compound (**1**) (175 MHz,  $\text{DMSO-}d_6$ )

**Figure S3.** DEPT 135 spectrum of compound (**1**) (175 MHz,  $\text{DMSO-}d_6$ )

**Figure S4.**  $^1\text{H-}^1\text{H}$  COSY spectrum of compound (**1**) (700 MHz,  $\text{DMSO-}d_6$ )

**Figure S5.**  $^1\text{H-}^{13}\text{C}$  HSQC spectrum of compound (**1**) (700 MHz,  $\text{DMSO-}d_6$ )

**Figure S6.**  $^1\text{H-}^{13}\text{C}$  HMBC spectrum of compound (**1**) (700 MHz,  $\text{DMSO-}d_6$ )

**Figure S7.**  $^1\text{H-}^1\text{H}$  NOESY spectrum of compound (**1**) (700 MHz,  $\text{DMSO-}d_6$ )

**Figure S8.** Key NOESY ( $\rightarrow$ , black) correlations and global energy minimum of **1**

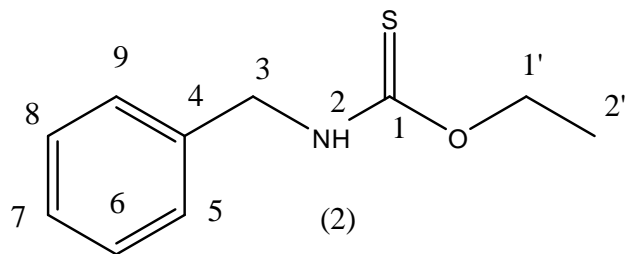

Benzyl-thiocarbamic acid *O*-ethyl ester

**Table S1**  $^1\text{H}$  (500 MHz) of compound **2** and  $^{13}\text{C}$  (125 MHz) NMR spectral data of compounds **2** in  $\text{CDCl}_3$

| Position  | $\text{H}^1$ NMR data<br>$\delta_{\text{H}}$ (ppm) ( <i>J</i> in Hz)                                                     | $\text{C}^{13}$ NMR data<br>$\delta_{\text{C}}$ (ppm) |
|-----------|--------------------------------------------------------------------------------------------------------------------------|-------------------------------------------------------|
| <b>1</b>  | -                                                                                                                        | 190 ( <i>Z</i> )<br>190.73 ( <i>E</i> )               |
| <b>2</b>  | 6.5 br. ( <i>Z</i> )<br>6.9 br. ( <i>E</i> )                                                                             | -                                                     |
| <b>3</b>  | 4.46 (2H, d, <i>J</i> = 5.8 Hz, $\text{CH}_2$ , <i>Z</i> )<br>4.78 (2H, d, <i>J</i> = 5.7 Hz, $\text{CH}_2$ , <i>E</i> ) | 47.27 ( <i>Z</i> )<br>49.31 ( <i>E</i> )              |
| <b>4</b>  | -                                                                                                                        | 136.63<br>136.96                                      |
| <b>5</b>  | 7.36 (1H, d, <i>J</i> = 7.5Hz)                                                                                           | 128.92                                                |
| <b>6</b>  | 7.33(1H, d, <i>J</i> = 7.5Hz)                                                                                            | 127.98                                                |
| <b>7</b>  | 7.31(1H, m)                                                                                                              | 127.79                                                |
| <b>8</b>  | 7.33(1H, d, <i>J</i> = 7.5Hz)                                                                                            | 127.98                                                |
| <b>9</b>  | 7.36 (1H, d, <i>J</i> = 7.5Hz)                                                                                           | 128.92                                                |
| <b>1'</b> | 4.58 (2H, q, <i>J</i> = 7.2 Hz, <i>Z</i> )<br>4.53 (2H, q, <i>J</i> = 7.2 Hz, <i>E</i> ),                                | 66.69( <i>Z</i> )<br>68.17 ( <i>E</i> )               |
| <b>2'</b> | 1.37 (3H, t, <i>J</i> = 7.2 Hz, <i>Z</i> )<br>1.33 (3H, t, <i>J</i> = 7.2 Hz, <i>E</i> )                                 | 14.32 ( <i>Z</i> )<br>14.38 ( <i>E</i> )              |

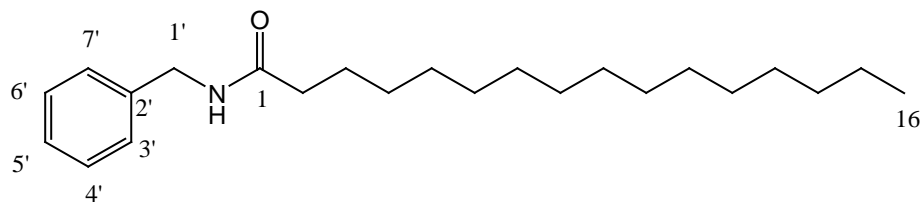

**Table S2**  $^1\text{H}$  (500 MHz) of compound **2** and  $^{13}\text{C}$  (125 MHz) NMR spectral data of compounds **3** in  $\text{CDCl}_3$

| Position | $\text{H}^1$ NMR data                       | $\text{C}^{13}$ NMR data  |
|----------|---------------------------------------------|---------------------------|
|          | $\delta_{\text{H}}$ (ppm) ( <i>J</i> in Hz) | $\delta_{\text{C}}$ (ppm) |
| 1        | -                                           | 173.0                     |
| 2        | 2.20 (t)                                    | 36.88                     |
| 3        | 1.65 (m)                                    | 22.72 to 31.95            |
| 4        | 1.16-1.29                                   | 22.72 to 31.95            |
| 5        | 1.16-1.29                                   | 22.72 to 31.95            |
| 6        | 1.16-1.29                                   | 22.72 to 31.95            |
| 7        | 1.16-1.29                                   | 22.72 to 31.95            |
| 8        | 1.16-1.29                                   | 22.72 to 31.95            |
| 9        | 1.16-1.29                                   | 22.72 to 31.95            |
| 10       | 1.16-1.29                                   | 22.72 to 31.95            |
| 11       | 1.16-1.29                                   | 22.72 to 31.95            |
| 12       | 1.16-1.29                                   | 22.72 to 31.95            |
| 13       | 1.16-1.29                                   | 22.72 to 31.95            |
| 14       | 1.16-1.29                                   | 22.72 to 31.95            |
| 15       | 1.16-1.29                                   | 22.72                     |
| 16       | 0.88                                        | 14.16.                    |
| 1'       | 4.45 (d)                                    | 43.62                     |
| 2'       | -                                           | 138.40                    |
| 3'       | 7.17 (1H, d, <i>J</i> = 8.0 Hz)             | 127.9                     |
| 4'       | 7.33(1H, m, overlapped)                     | 128.8                     |
| 5'       | 7.33(1H, m, overlapped)                     | 127.55                    |
| 6'       | 7.33(1H, m, overlapped)                     | 128.8                     |
| 7'       | 7.17 (1H, d, <i>J</i> = 8.0 Hz)             | 127.9                     |

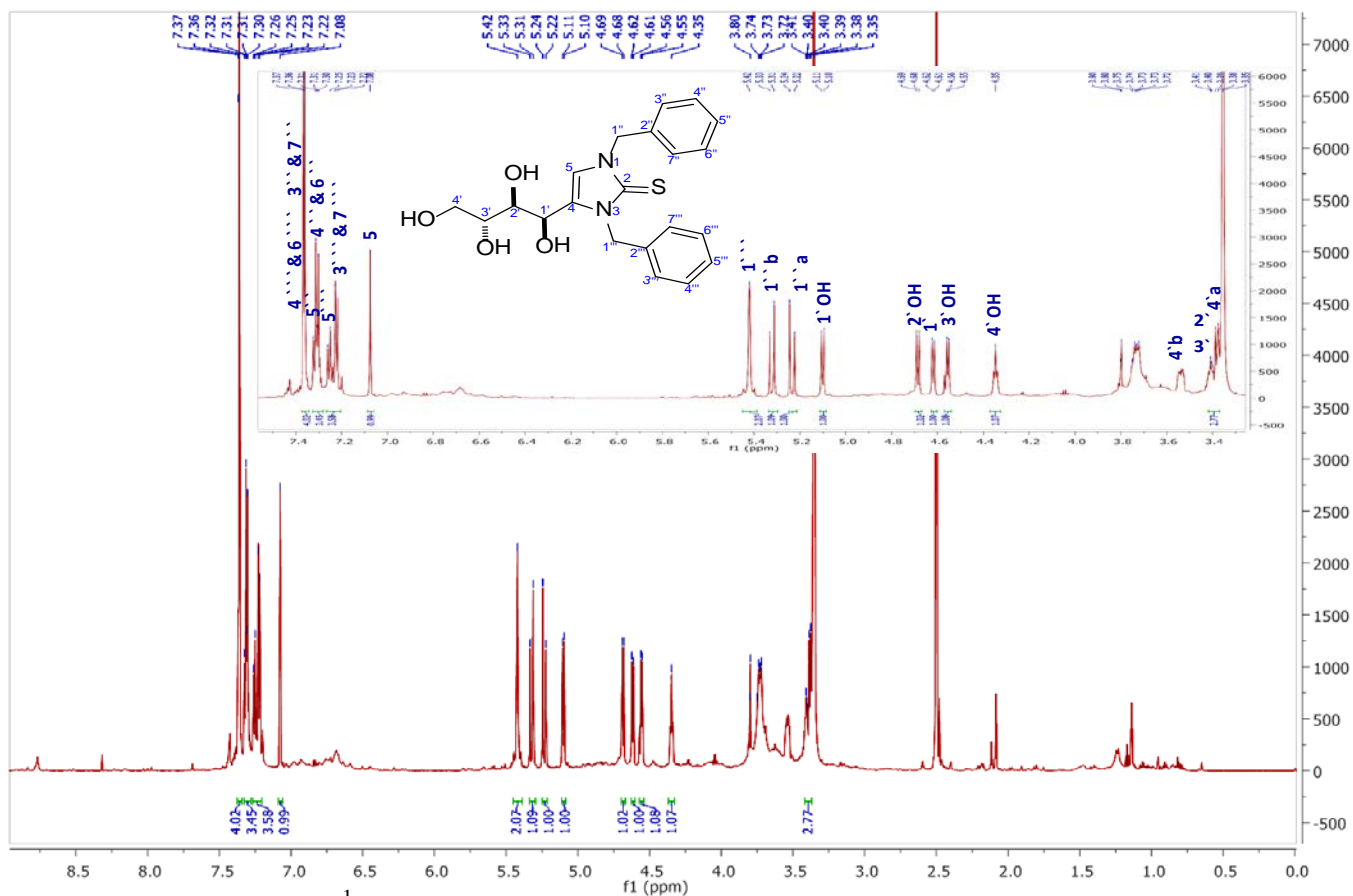

Figure S1.  $^1\text{H}$  NMR spectrum of compound (1) (700 MHz,  $\text{DMSO-}d_6$ )

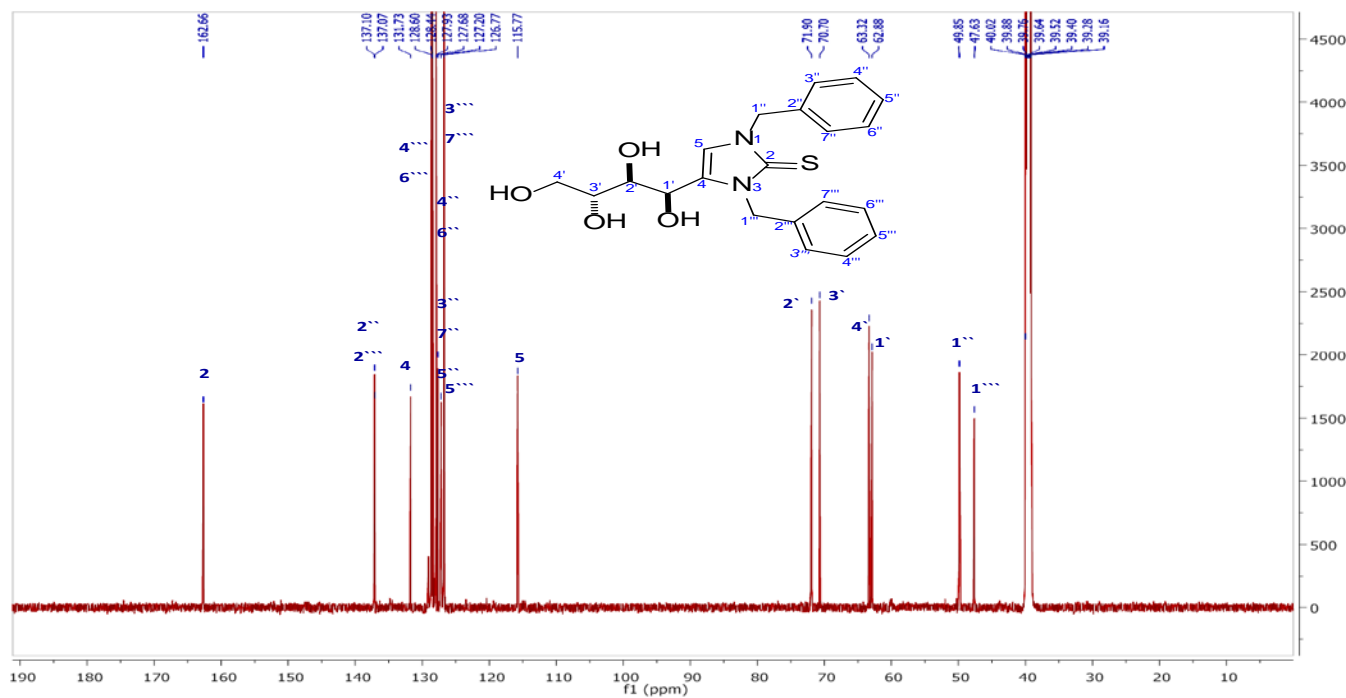

Figure S2.  $^{13}\text{C}$  NMR spectrum of compound (1) (175 MHz,  $\text{DMSO-}d_6$ )

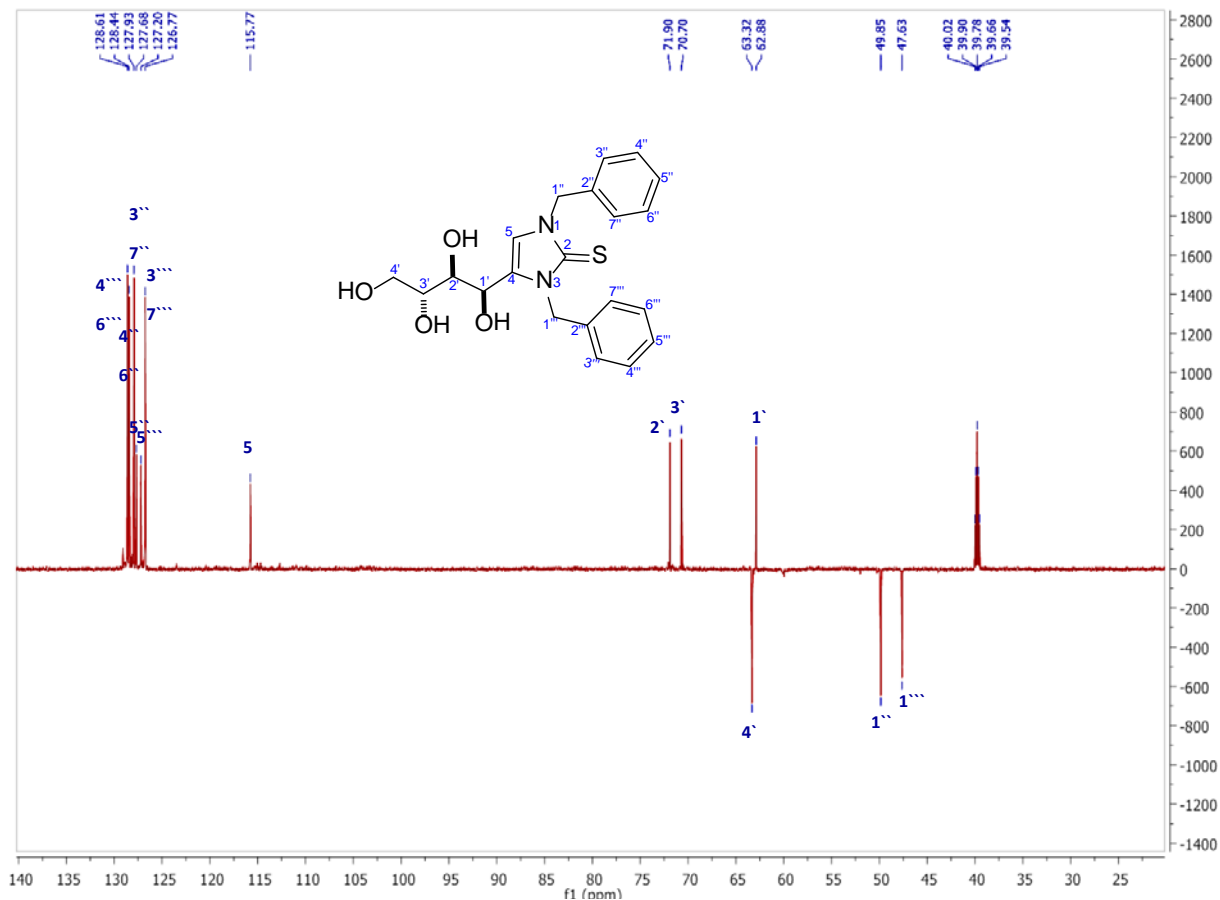

**Figure S3.** DEPT 135 spectrum of compound (1) (175 MHz, DMSO-*d*<sub>6</sub>)

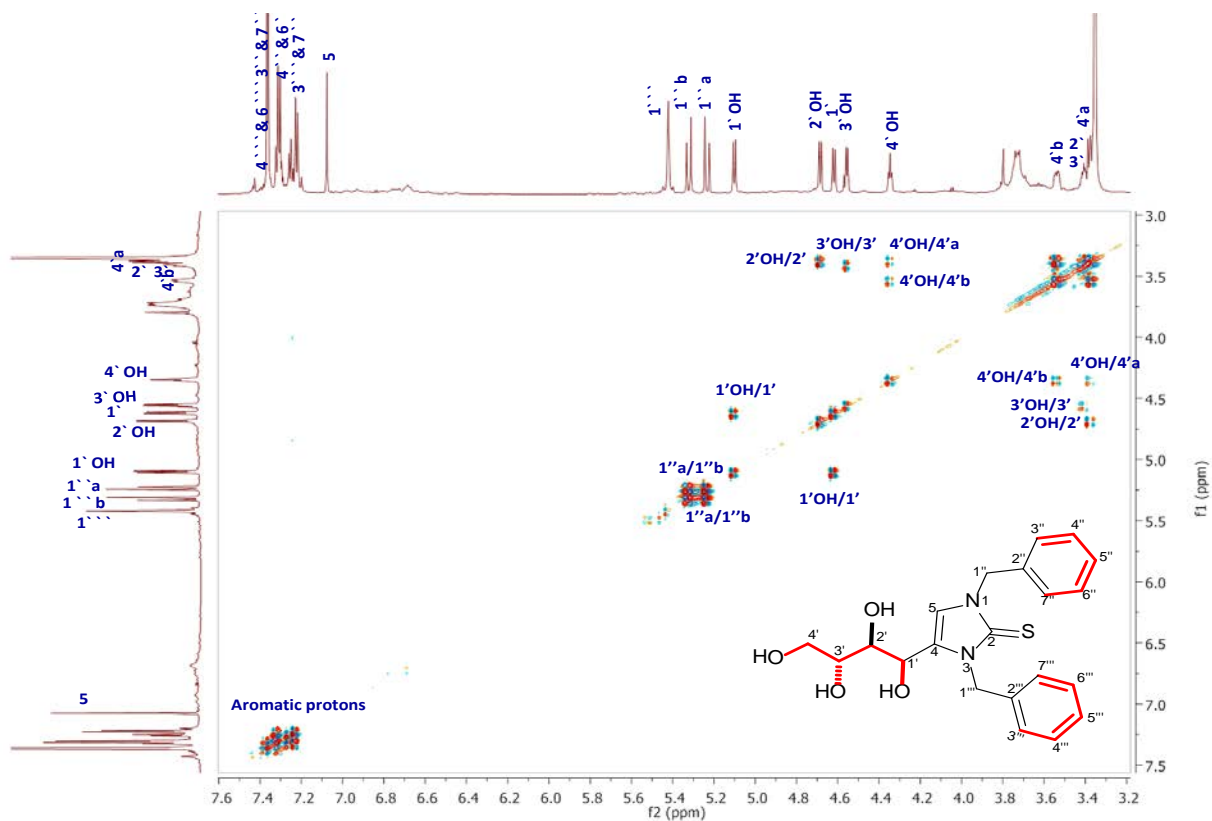

**Figure S4.** <sup>1</sup>H-<sup>1</sup>H COSY spectrum of compound (1) (700 MHz, DMSO-*d*<sub>6</sub>)

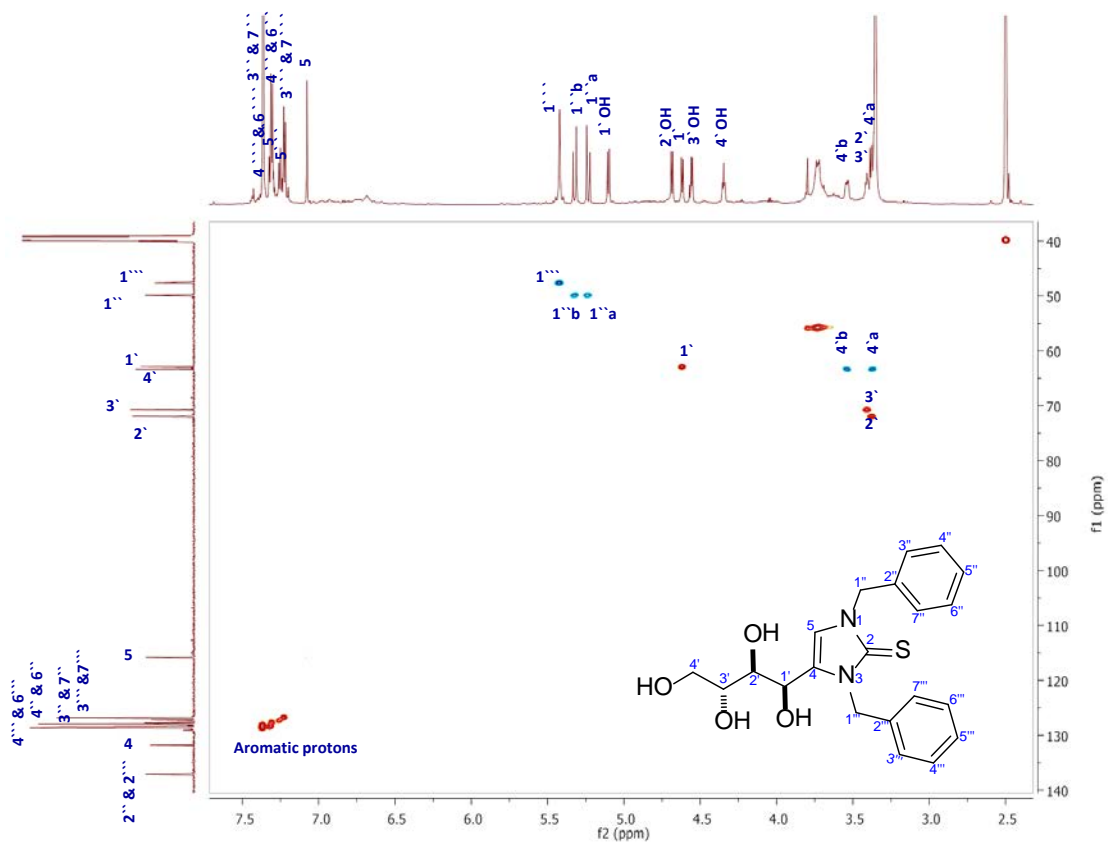

Figure S5.  $^1\text{H}$ - $^{13}\text{C}$  HSQC spectrum of compound (1) (700 MHz,  $\text{DMSO-}d_6$ )

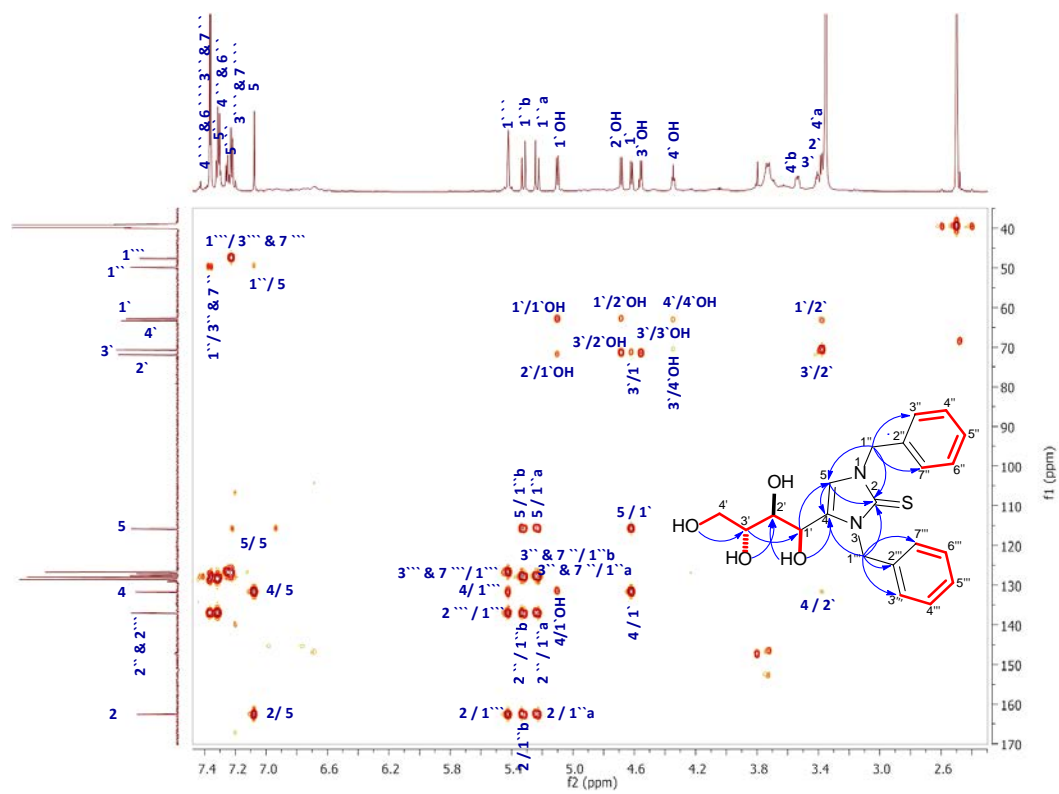

Figure S6.  $^1\text{H}$ - $^{13}\text{C}$  HMBC spectrum of compound (1) (700 MHz,  $\text{DMSO-}d_6$ )

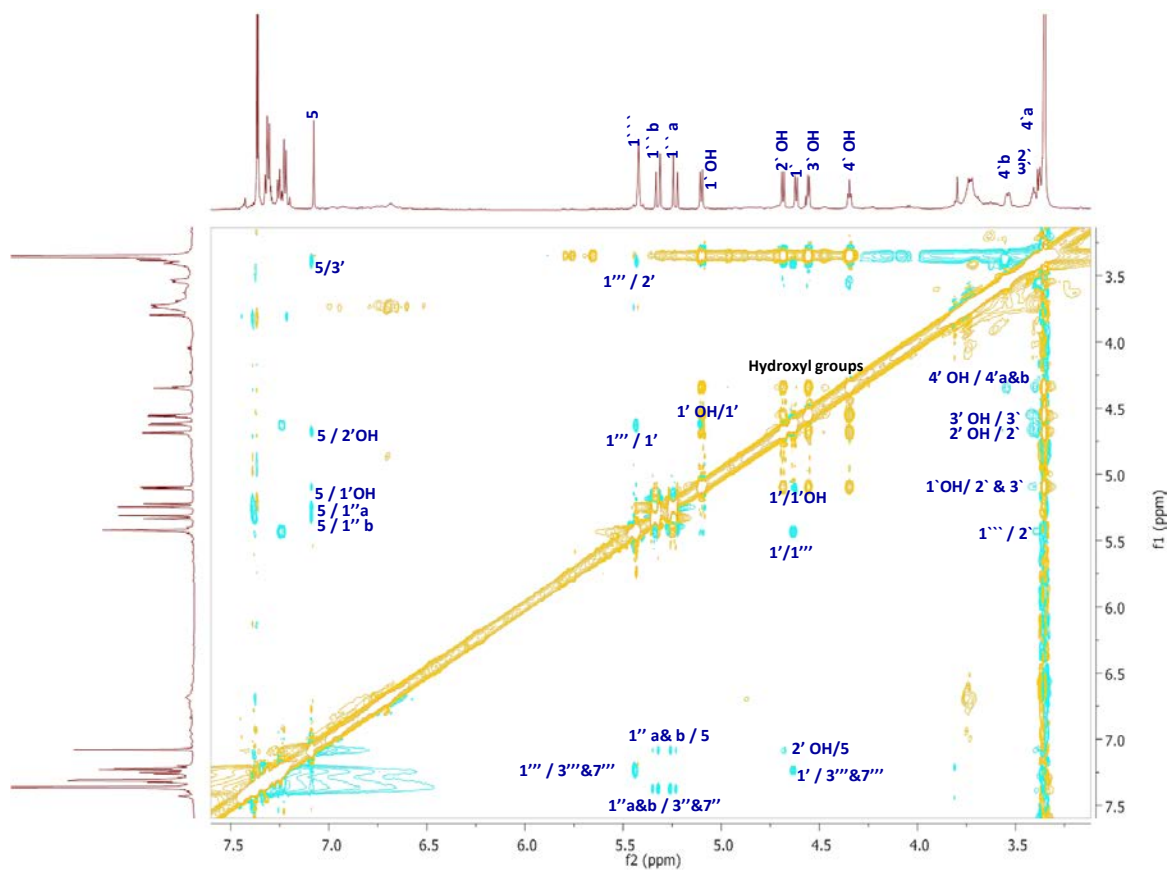

**Figure S7.**  $^1\text{H}$ - $^1\text{H}$  NOESY spectrum of compound (**1**) (700 MHz,  $\text{DMSO-d}_6$ )



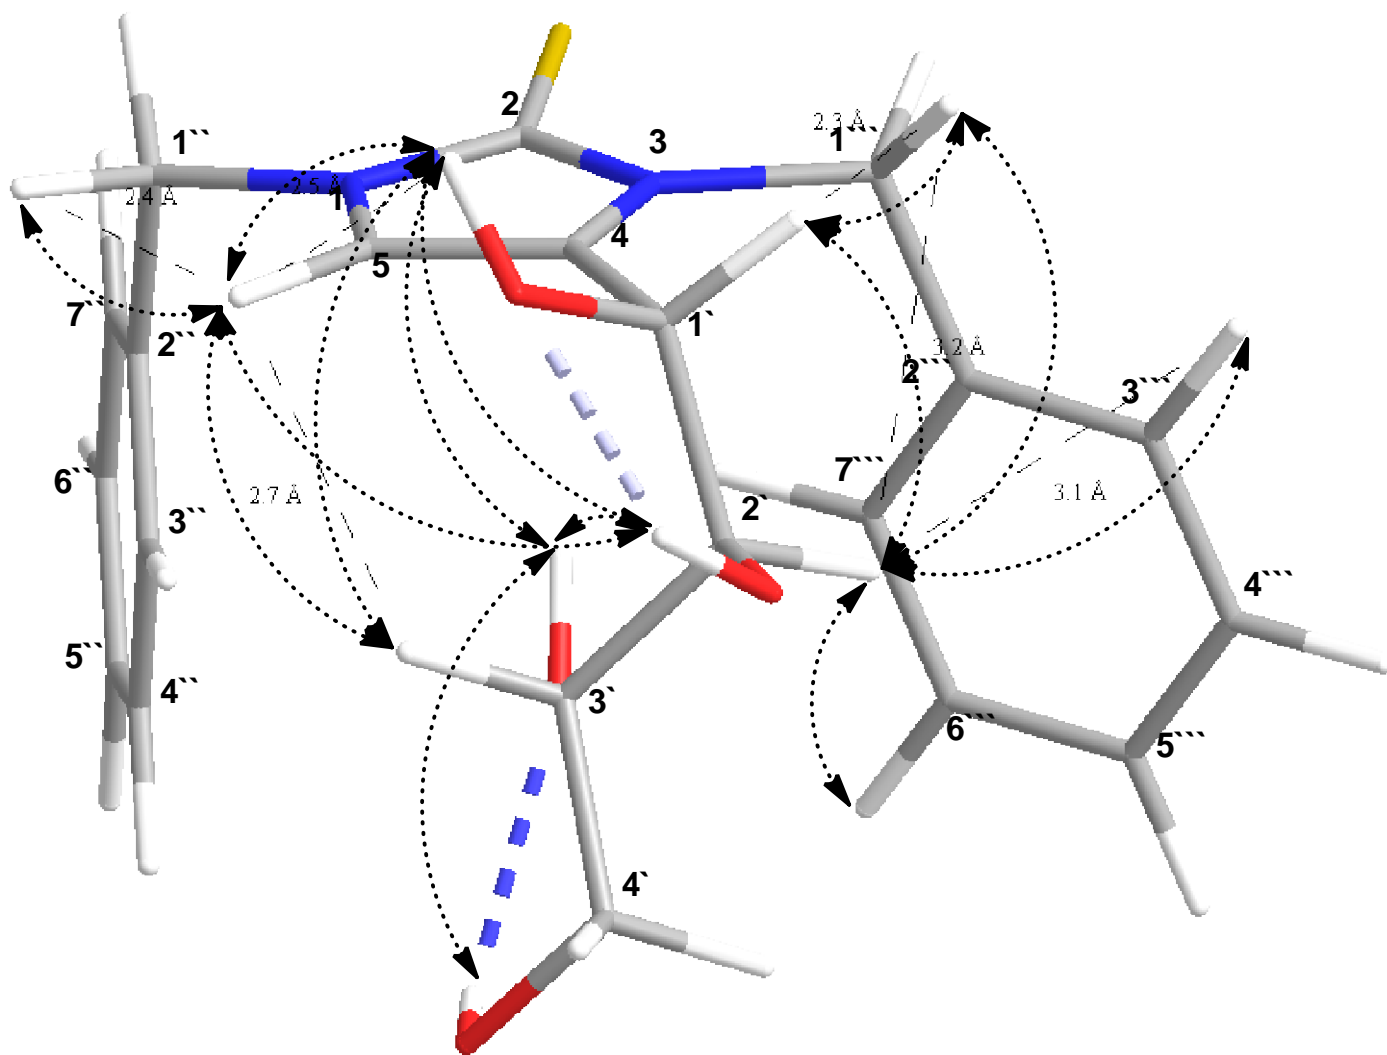

**Figure S8.** Key NOESY (→, black) correlations and global energy minimum of **1**.
